# Supplementary material for: Liponitroxides: EPR study and their efficacy as antioxidants in lipid membranes
Source: Royal Society of Chemistry journal article supplement (doi:10.1039/c5ra18963b), 2015-01-01
Supplement: c5ra18963b1.pdf [file c5ra18963b1.pdf]

# Liponitroxides: EPR study and their efficacy as antioxidants in lipid membranes

Giovanna Mobbili, Emanuela Crucianelli, Antonio Barbon, Massimo Marcaccio, Michela Pisani, Annalisa Dalzini, Eleonora Ussano, Marco Bortolus,\* Pierluigi Stipa\* and Paola Astolfi\*

## *Content of Supporting Information*

- **Spectroscopic characterization of liponitroxides**
- **Cyclic Voltammetric curves of Chol-NO at low temperature in THF; Background cyclic voltammetric curves for 0.08 M NaBF<sub>4</sub> aqueous electrolyte solution with PBS buffer at pH=7.4**
- **Accessibility parameters  $\Pi_i$  to oxygen and to NiEDDA**

## **Spectroscopic characterization of liponitroxides**

**1,2-O-Dioleoyl-3-O-[ethyl (2',2',5',5'-tetramethyl-3'-pyrroline-1'-oxyl-3'-carboxylate)] *sn*-glycerol [DOG(L)-NO]**

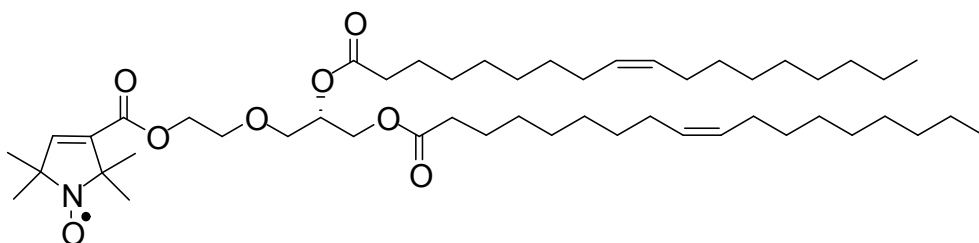

<sup>1</sup>H NMR (CDCl<sub>3</sub>, 400 MHz):  $\delta$  0.89 (t,  $J$  = 6.4 Hz, 6H); 1.20-1.45 (m, 52H); 1.50-1.70 (m, 4H); 1.95-2.10 (m, 8H); 2.31 (dd,  $J$  = 6.8 Hz,  $J$  = 14.4 Hz, 4H); 3.55-3.80 (m, 4H); 4.10-4.25 (m, 1H); 4.30-4.40 (m, 1H); 4.50-4.70 (m, 2H); 5.18-5.30 (m, 1H); 5.30-5.42 (m, 4H); 6.58 (s, 1H).

<sup>13</sup>C NMR (CDCl<sub>3</sub>, 100 MHz):  $\delta$  11.3, 19.8, 22.0, 22.1, 24.3, 24.3, 26.2, 26.3, 26.4, 26.6, 26.8, 29.0, 31.2, 31.6, 59.9, 66.6, 66.7, 66.9, 126.7, 127.1, 170.0, 170.3.

HRMS (TOF ES) Calcd for C<sub>50</sub>H<sub>88</sub>NO<sub>8</sub> [M + H]<sup>+</sup> 831.6589, found 831.6561.

IR (KBr, cm<sup>-1</sup>) : 2927; 1745; 1727; 1629; 1463.

ESR spectrum (CHCl<sub>3</sub>): triplet with  $g$ -factor = 2.0058<sub>3</sub> and  $a_N$  = 1.475 mT

**1-O-Oleoyl-2-hydroxy-3-O-[ethyl (2',2',5',5'-tetramethyl-3'-pyrroline-1'-oxyl-3'-carboxylate)] *sn*-glycerol [OG(L)-NO]**

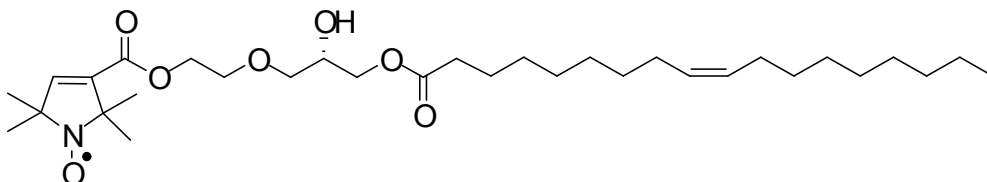

<sup>1</sup>H NMR (CDCl<sub>3</sub>, 400MHz): δ 0.88 (t,  $J$  = 6.4 Hz, 3H); 1.18-1.40 (m, 32H); 1.57-1.70 (m, 2H); 1.95-2.05 (m, 4H); 2.32-2.40 (m, 2H); 3.52-3.65 (m, 2H); 3.65-3.80 (m, 3H); 3.96-4.07 (m, 1H); 4.08-4.22 (m, 2H); 4.52-4.68 (m, 1H); 5.29-5.41 (m, 2H); 6.58 (s, 1H).

<sup>13</sup>C NMR (CDCl<sub>3</sub>, 100 MHz): δ 13.4; 21.9; 24.2; 26.4; 26.4; 28.3; 28.4; 28.5; 28.7; 29.0; 31.1; 33.4; 61.9; 61.9; 64.7; 68.1; 68.9; 69.2; 71.3; 71.9; 128.9; 129.2; 172.7; 173.1.

HRMS (TOF ES) Calcd for C<sub>32</sub>H<sub>57</sub>NO<sub>7</sub> [M + Na]<sup>+</sup> 589.3955, found 589.3952.

IR (KBr, cm<sup>-1</sup>) : 3445; 2929; 2856; 1723; 1716; 1630; 1463.

ESR spectrum (CHCl<sub>3</sub>): triplet with  $g$ -factor = 2.0058<sub>3</sub> and  $a_N$  = 1.479 mT

**1,2-O-Dioleoyl-3-O-(2',2',5',5'-tetramethyl-3'-pyrroline-1'-oxyl-3'-carboxylate) *sn*-glycerol [DOG-NO]**

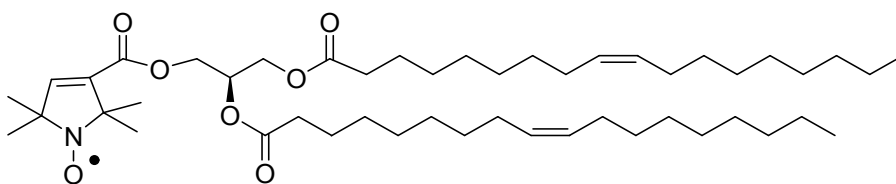

<sup>1</sup>H NMR (CDCl<sub>3</sub>, 400 MHz): δ 0.88 (t,  $J$  = 6.4 Hz, 6H); 1.20-1.38 (m, 52H); 1.55-1.68 (m, 4H); 1.92-2.08 (m, 8H); 2.32 (t,  $J$  = 8 Hz, 4H); 4.17 (dd,  $J$  = 5.6 Hz,  $J$  = 12.0 Hz, 1H); 4.25 (dd,  $J$  = 6 Hz,  $J$  = 12.0 Hz, 1H); 4.30-4.37 (m, 2H); 5.29-5.40 (m, 5H); 6.59 (s, 1H).

<sup>13</sup>C NMR (CDCl<sub>3</sub>, 100 MHz): δ 11.8, 11.8, 20.3, 20.3, 22.4, 22.7, 24.8, 24.8, 24.9, 26.7, 26.9, 26.9, 27.0, 27.0, 27.3, 27.3, 27.4, 29.5, 29.5, 31.6, 32.1, 59.6, 59.7, 66.4, 127.2, 127.6, 127.7, 170.3, 170.8.

HRMS (TOF ES) Calcd for C<sub>48</sub>H<sub>84</sub>NO<sub>7</sub> [M + H]<sup>+</sup> 787.66327, found 787.6346.

IR (KBr,  $\text{cm}^{-1}$ ) : 2927; 2855; 1746; 1728; 1633; 1463.

ESR spectrum ( $\text{CHCl}_3$ ): triplet with  $g$ -factor = 2.0058<sub>4</sub> and  $a_N$  = 1.475 mT

**1-O-Oleoyl-2-hydroxyl-3-O-(2',2',5',5'-tetramethyl-3'-pyrroline-1'-oxyl-3'-carboxylate) *sn*-glycerol [OG-NO]**

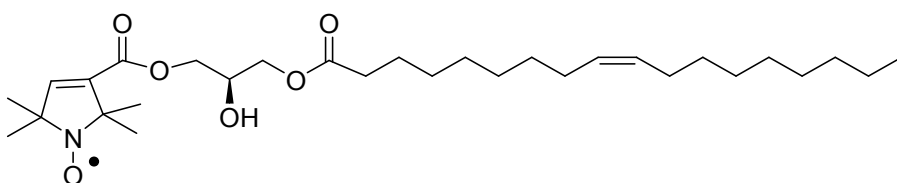

$^1\text{H}$  NMR ( $\text{CDCl}_3$ , 400 MHz):  $\delta$  0.89 (t,  $J$  = 6.4 Hz, 3H); 1.20-1.42 (m, 32H); 1.55-1.70 (m, 2H); 1.95-2.05 (m, 4H); 2.30-2.42 (m, 2H); 4.12-4.30 (m, 4H); 4.42-4.62 (m, 1H); 5.30-5.40 (m, 2H); 6.58 (s, 1H).

$^{13}\text{C}$  NMR ( $\text{CDCl}_3$ , 100 MHz):  $\delta$  13.8, 22.3, 24.5, 26.8, 26.9, 28.7, 28.8, 29.0, 29.2, 29.3, 29.4, 31.5, 33.8, 64.3, 64.9, 68.1, 129.3, 129.7, 173.6.

HRMS (TOF ES) Calcd for  $\text{C}_{30}\text{H}_{52}\text{NO}_6$  [ $\text{M} + \text{H}$ ]<sup>+</sup> 523.3874, found 523.3887.

IR (KBr,  $\text{cm}^{-1}$ ) : 3428; 2927; 2855; 1724; 1632; 1463.

ESR spectrum ( $\text{CHCl}_3$ ): triplet with  $g$ -factor = 2.0058<sub>3</sub> and  $a_N$  = 1.479 mT

**Cholesteryl (2,2,5,5-tetramethyl-3-pyrroline-1-oxyl)-3-carboxylate [Chol-NO]**

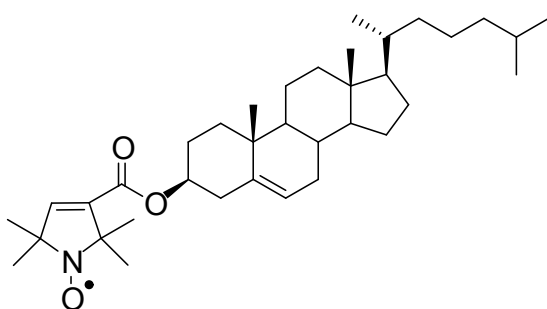

$^1\text{H}$  NMR ( $\text{CDCl}_3$ , 400 MHz):  $\delta$  0.70 (s, 3H); 0.90-2.06 (m, 40H); 0.90 (d,  $J$  = 6.4 Hz, 6H); 0.93 (d,  $J$  = 6.4 Hz, 3H); 1.05 (s, 3H); 1.28 (s, 6H); 1.39 (s, 6H); 2.30-2.60 (m, 2H); 4.80-5.05 (m, 1H); 5.37-5.48 (m, 1H); 6.58 (s, 1H).

$^{13}\text{C}$  NMR ( $\text{CDCl}_3$ , 100 MHz):  $\delta$  12.5; 19.4; 20.0; 21.6; 23.3; 23.5; 24.0; 24.9; 27.7; 28.6; 28.8; 32.4; 32.5; 36.3; 36.7; 37.1; 40.1; 40.3; 42.8; 50.5; 56.7; 57.2; 74.6; 123.6; 139.8.

MS(ESI)  $m/z$ : 575.2  $[M + Na^+]^+$ . mp = 173-175°C.

IR (KBr,  $cm^{-1}$ ) : 2934; 2863; 1711; 1634.

Anal  $C_{50}H_{88}NO_8$  (575.2) Calc C, 78.21%; H, 10.57%; N, 2.53%. Found: C, 78.35%; H, 10.82%; N, 2.53%.

ESR spectrum ( $CHCl_3$ ): triplet with  $g$ -factor = 2.0058<sub>7</sub> and  $a_N = 1.479$  mT

Cyclic Voltammetric curves of Chol-NO at low temperature in THF; Background cyclic voltammetric curves for 0.08 M NaBF<sub>4</sub> aqueous electrolyte solution with PBS buffer at pH=7.4

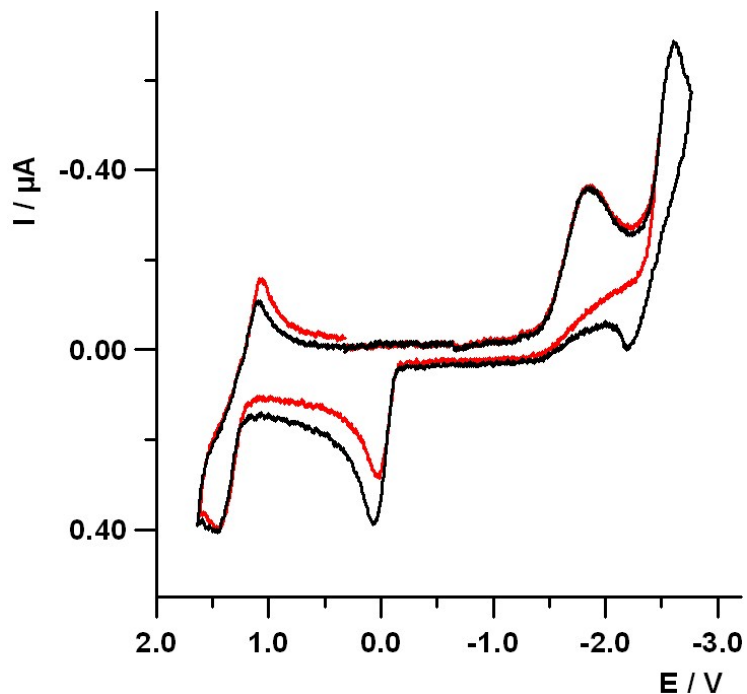

**Figure S1.** Cyclic voltammetric curves of species Chol-NO 1 mM in 0.08 M TBAH/THF solution. Sweep rate 1 V/s, working electrode: Pt (125 μm, diameter), T=213 K. The red curve has been recorded reversing the potential scan just before the second voltammetric reduction process.

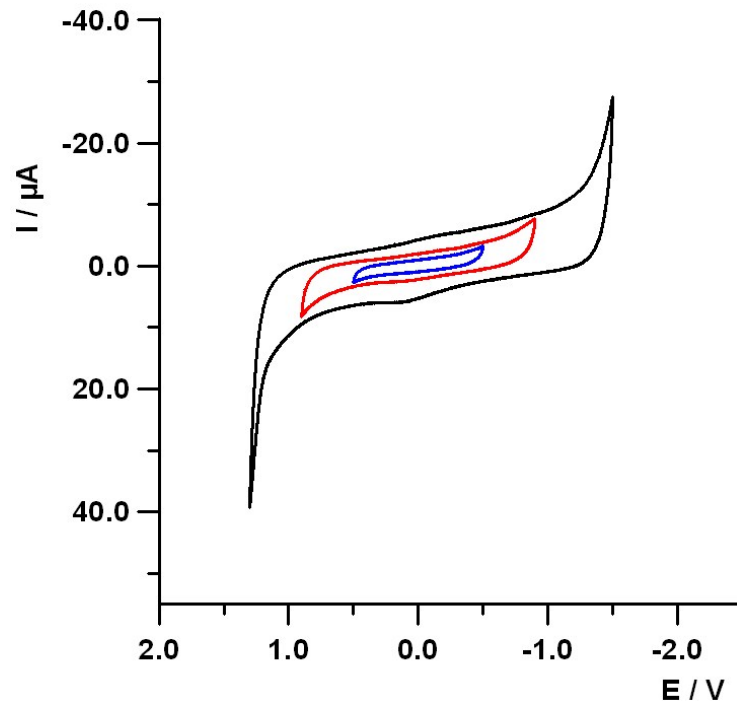

**Figure S2.** Background cyclic voltammetric curves for 0.08 M NaBF<sub>4</sub> aqueous electrolyte solution with PBS buffer at pH=7.4, GC disk electrode (3 mm, diameter), sweep rate 0.2 V/s, T=298 K. The blue, red and black curves have been recorded over three increasing useful potential windows.

### Accessibility parameters:

The best-fit  $p_{1/2}$  parameters can be used to calculate the dimensionless accessibility parameters  $\Pi_i$  for the two paramagnetic relaxants:

$$\Pi_i = \frac{p_{1/2}^i - p_{1/2}^{nitrogen}}{\Delta H_{pp}} \cdot \frac{\Delta H_{pp}^{DPPH}}{p_{1/2}^{DPPH}} = \frac{\Delta p_{1/2}^i}{\Delta H_{pp}} \cdot \frac{\Delta H_{pp}^{DPPH}}{p_{1/2}^{DPPH}}$$

The index  $i$  denotes either oxygen or NiEDDA,  $\Delta H_{pp}$  is the peak-to-peak linewidth in the absence of saturation. The calculation of the accessibilities requires the calibration of the instrument. For this reason the saturation profile and the saturation parameter were obtained also for DPPH (2,2-diphenyl-1-picrylhydrazyl)<sup>[1]</sup>: the value for the DPPH calibration factor in our setup is 231 W/T.

**Table S1.** Oxygen ( $\Pi_{O_2}$ ) and NiEDDA accessibility ( $\Pi_{NiEDDA}$ ) of the different reference spin labels (SL) and of the NOXs in POPC small unilamellar vesicles obtained at room temperature. The reported uncertainty is a rough estimate based on repeated experiments

| SL                | $\Pi_{O_2}$<br>( $\pm 0.02$ ) | $\Pi_{NiEDDA}$<br>( $\pm 0.02$ ) | NOX       | $\Pi_{O_2}$<br>( $\pm 0.02$ ) | $\Pi_{NiEDDA}$<br>( $\pm 0.02$ ) |
|-------------------|-------------------------------|----------------------------------|-----------|-------------------------------|----------------------------------|
| TempoPC           | 0.35                          | 0.40                             | Chol-NO   | 0.32                          | 0.16                             |
| 5DPC <sup>a</sup> | 0.40                          | 0.10                             | DOG(L)-NO | 0.56                          | 0.14                             |
| 7DPC <sup>a</sup> | 0.31                          | 0.10                             | DOG-NO    | 0.57                          | 0.09                             |
| 10DPC             | 0.67                          | 0.08                             | OG(L)-NO  | 0.63                          | 0.10                             |
| 12DPC             | 0.99                          | 0.09                             | OG-NO     | 0.76                          | 0.09                             |
| 14DPC             | 0.87                          | 0.04                             |           |                               |                                  |

<sup>a</sup>the apparent inversion of 5DPC and 7DPC is present also in the original paper<sup>[2]</sup>.

[1] C. Altenbach, W. Froncisz, R. Hemker, H. McHaourab and W. L. Hubbell, *Biophys. J.* **2005**, *89*, 2103-2112.

[2] C. Altenbach, D. A. Greenhalgh, H. G. Khorana and W. L. Hubbell, *Proc. Natl. Acad. Sci. U. S. A.* **1994**, *91*, 1667-1671.
